# Supplementary material for: Acceptability of home fortification with multiple micro-nutrients among Sri Lankan children
Source: PubMed Central journal article supplement (PMC8694412; doi:10.1371/journal.pone.0261516), 2021-12-22
Supplement: pone.0261516.s001.pdf [file pone.0261516.s001.pdf]

Table S1: Univariate analysis of factors affecting adherence

| Variable                 |                       | Adjusted OR | 95% CI |       | p-value |
|--------------------------|-----------------------|-------------|--------|-------|---------|
|                          |                       |             | Lower  | Upper |         |
| *Child's age (months)    |                       | -0.171      | 0.777  | 0.915 | <0.001  |
| Child's gender           | Female                | 1           |        |       |         |
|                          | Male                  | -0.077      | 0.455  | 1.884 | 0.831   |
| *Number of siblings      |                       | -0.082      | 0.577  | 1.471 | 0.730   |
| Birth order of the child | First                 |             |        |       |         |
|                          | ≥ Second              | 0.065       | 0.523  | 2.176 | 0.859   |
| Extended family          | No                    | 1           |        |       |         |
|                          | Yes                   | 0.332       | 0.678  | 2.862 | 0.367   |
| Mother's education       | Tertiary              | 1           |        |       |         |
|                          | Collegiate            | 0.212       | 0.526  | 2.907 | 0.627   |
|                          | Senior secondary/less | -0.018      | 0.411  | 2.348 | 0.967   |
| Father's education       | Tertiary              | 1           |        |       |         |
|                          | Collegiate            | 0.130       | 0.456  | 2.844 | 0.780   |
|                          | Senior secondary/less | 20.249      | -      | -     | 0.999   |
| Mother's employment      | Housewife             | 1           |        |       |         |
|                          | Income generating     | 0.259       | 0.631  | 2.663 | 0.480   |
| *Household income (LKR)  |                       | 0.006       | 0.998  | 1.015 | 0.158   |
| *Knowledge on anaemia    |                       | 0.015       | 1.004  | 1.027 | 0.008   |
| Acceptability            |                       | 0.269       | 1.184  | 1.446 | <0.001  |

\*Continuous variables

Table S2: Univariate analysis of factors associated with anemia knowledge

| Variable                 |          | Adjusted OR | 95% CI  |       | p-value |
|--------------------------|----------|-------------|---------|-------|---------|
|                          |          |             | Lower   | Upper |         |
| *Child's age (months)    |          | -0.458      | -1.562  | 0.646 | 0.413   |
| Child's gender           | Female   | 1           |         |       |         |
|                          | Male     | -0.256      | -10.429 | 9.916 | 0.960   |
| *Number of siblings      |          | -2.714      | -9.461  | 4.032 | 0.428   |
| Birth order of the child | First    |             |         |       |         |
|                          | ≥ Second | 3.345       | -13.617 | 6.747 | 0.506   |

|                         |                       |        |        |        |        |
|-------------------------|-----------------------|--------|--------|--------|--------|
| Extended family         | No                    | 1      |        |        |        |
|                         | Yes                   | 7.077  | -3.057 | 17.210 | 0.170  |
| Mother's education      | Tertiary              | 1      |        |        |        |
|                         | Collegiate            | -24.37 | -34.55 | -14.16 | <0.001 |
|                         | Senior secondary/less | -40.69 | -51.43 | -29.96 | <0.001 |
| Father's education      | Tertiary              | 1      |        |        |        |
|                         | Collegiate            | -30.23 | -40.62 | -19.83 | <0.001 |
|                         | Senior secondary/less | -33.01 | -44.12 | 22.91  | <0.001 |
| Mother's employment     | Housewife             | 1      |        |        |        |
|                         | Income generating     | 21.752 | 12.149 | 31.355 | <0.001 |
| *Household income (LKR) |                       | 0.271  | 0.180  | 0.363  | <0.001 |

\*Continuous variables

Table S3: Factors affecting anemia knowledge

| Variable                |                       | Adjusted OR | 95% CI |        | p-value |
|-------------------------|-----------------------|-------------|--------|--------|---------|
|                         |                       |             | Lower  | Upper  |         |
| Mother's education      | Tertiary              | 1           |        |        |         |
|                         | Collegiate            | -18.32      | -29.65 | -6.98  | 0.002   |
|                         | Senior secondary/less | -33.04      | -45.54 | -20.54 | <0.001  |
| *Household income (LKR) |                       | 0.120       | 0.016  | 0.223  | 0.024   |

\*Continuous variable. Overall model:  $F_{3,150} = 22.46$ ,  $p < 0.001$ ;  $R^2 = 0.31$
